# Supplementary material for: An Autophagy Modulator Peptide Prevents Lung Function Decrease and Corrects Established Inflammation in Murine Models of Airway Allergy
Source: MDPI journal article supplement (doi:10.3390/cells10092468), 2021-09-18
Supplement: s1 [file s1]

# **An Autophagy Modulator Peptide Prevents Lung Function Decrease and Corrects Established Inflammation in Murine Models of Airway Allergy**

**François Daubeuf** <sup>1,2</sup>, **Nicolas Schall** <sup>3</sup>, **Nathalie Petit-Demoulière** <sup>1,3</sup>, **Nelly Frossard** <sup>1</sup> and **Sylviane Muller** <sup>3,4,5,\*</sup>

<sup>1</sup> CNRS-Strasbourg University Laboratoire d'Innovation Thérapeutique/Strasbourg Drug Discovery and Development Institute (IMS), Faculté de Pharmacie, 67400 Illkirch, France; francois.daubeuf@unistra.fr (F.D.); nathalie.petit-demouliere@unistra.fr (N.P.-D.); nelly.frossard@unistra.fr (N.F.)

<sup>2</sup> CNRS UMS3286, Plate-forme de chimie biologique intégrative de Strasbourg/Strasbourg Drug Discovery and Development Institute (IMS), 67400 Illkirch, France

<sup>3</sup> CNRS-Strasbourg University Unit Biotechnology and Cell signaling/Strasbourg Drug Discovery and Development Institute (IMS), Strasbourg, France; Ecole Supérieure de Biotechnologie de Strasbourg, 67400 Illkirch, France; n.schall@unistra.fr

<sup>4</sup> Fédération Hospitalo-Universitaire OMICARE, Fédération de Médecine Translationnelle de Strasbourg, Strasbourg University, 67000 Strasbourg, France

<sup>5</sup> University of Strasbourg Institute for Advanced Study, 67000 Strasbourg, France

\* Correspondence: [sylviane.muller@unistra.fr](mailto:sylviane.muller@unistra.fr)

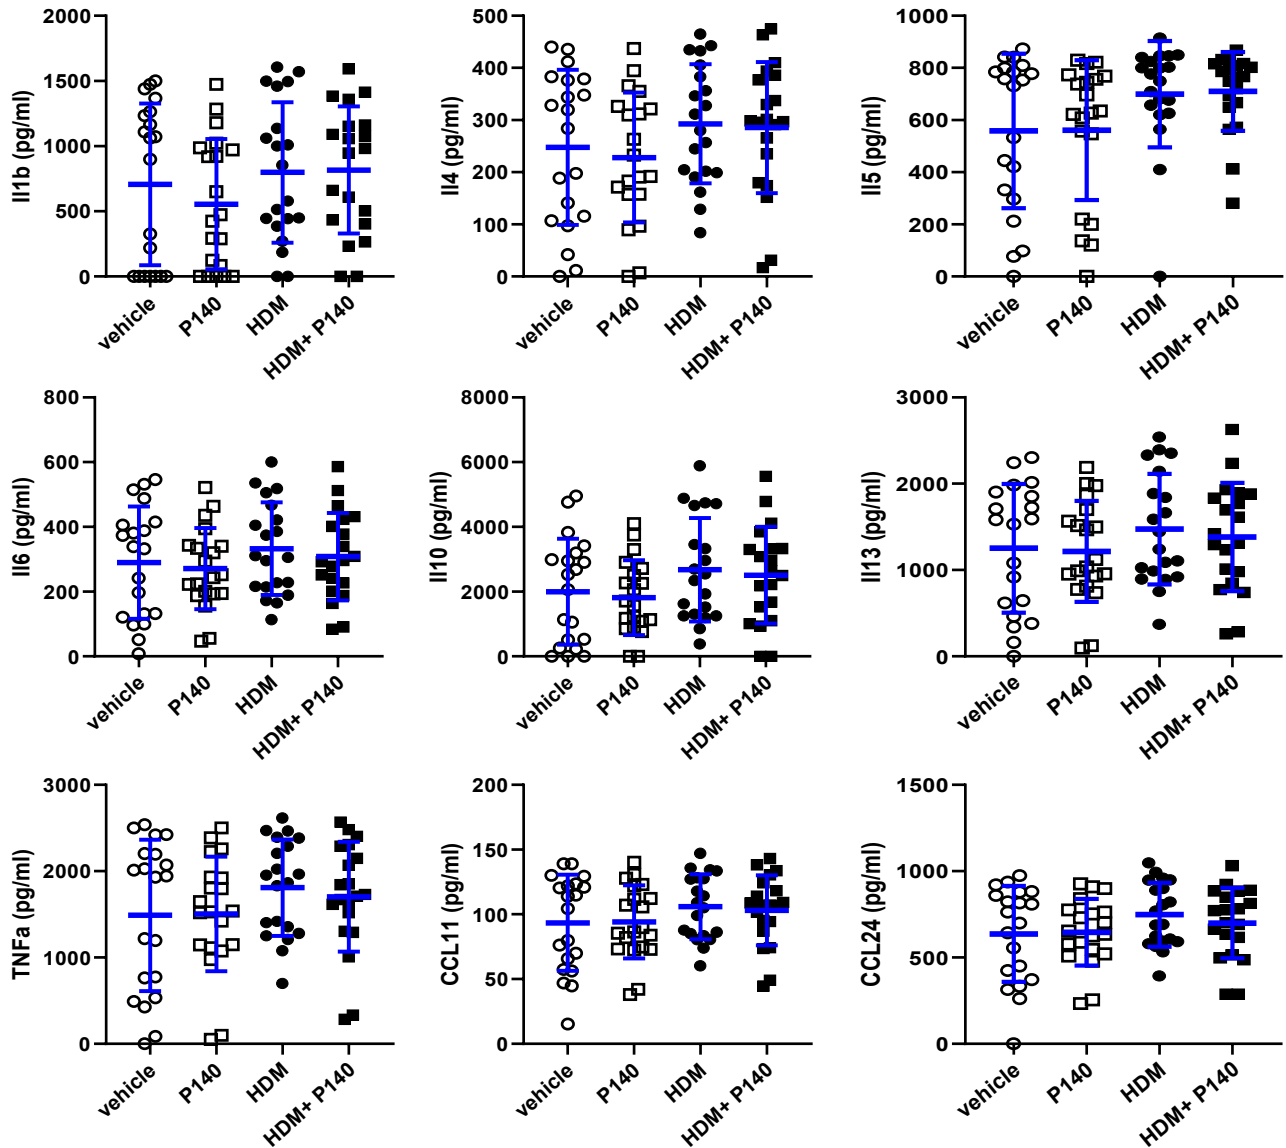

**Supplementary Figure S1.** ELISA measurement of cytokines/chemokines in lung extracts of mice of the four study groups ( $n = 20$ ). The data are presented as means  $\pm$  SEM. Differences between groups were tested for statistical significance using one-way ANOVA followed by Tukey's post-test. Data were considered significantly different when  $p \leq 0.05$ .

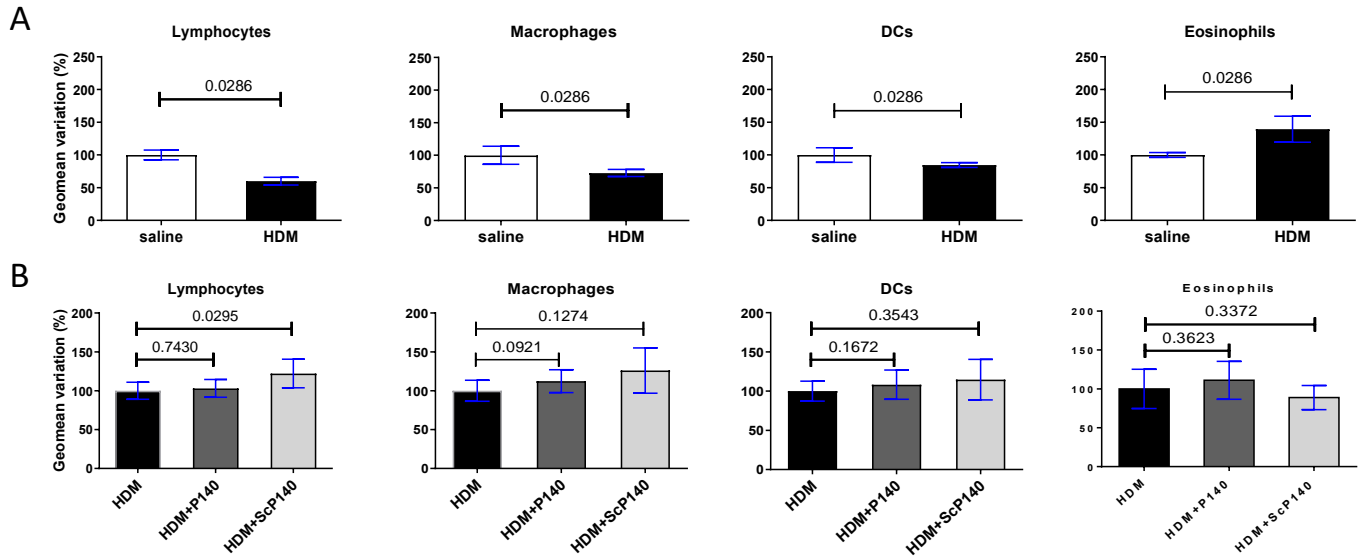

**Supplementary Figure S2.** Measurement of the autophagy marker SQSTM1 in the cells of BALFs collected from mice from HDM-sensitized and challenged mice. 9-week-old female BALB/c mice were sensitized and challenged intranasally with HDM as indicated in Figure 2A. They receive vehicle or P140 intravenously at day 22; BALFs were collected at day 31. SQSTM1 expression was measured by flow cytometry in different cell subsets. **(A)** Effect of HDM versus saline. **(B)** Effect of P140 (and ScP140 control peptide) versus vehicle in HDM-induced mice. The data are represented as the mean variation  $\pm$  SEM of the geomean (in%). HDM,  $n = 8$  ; HDM + P140,  $n = 9$  ; HDM + ScP140,  $n = 5$  (pooled data from 2 independent experiments).

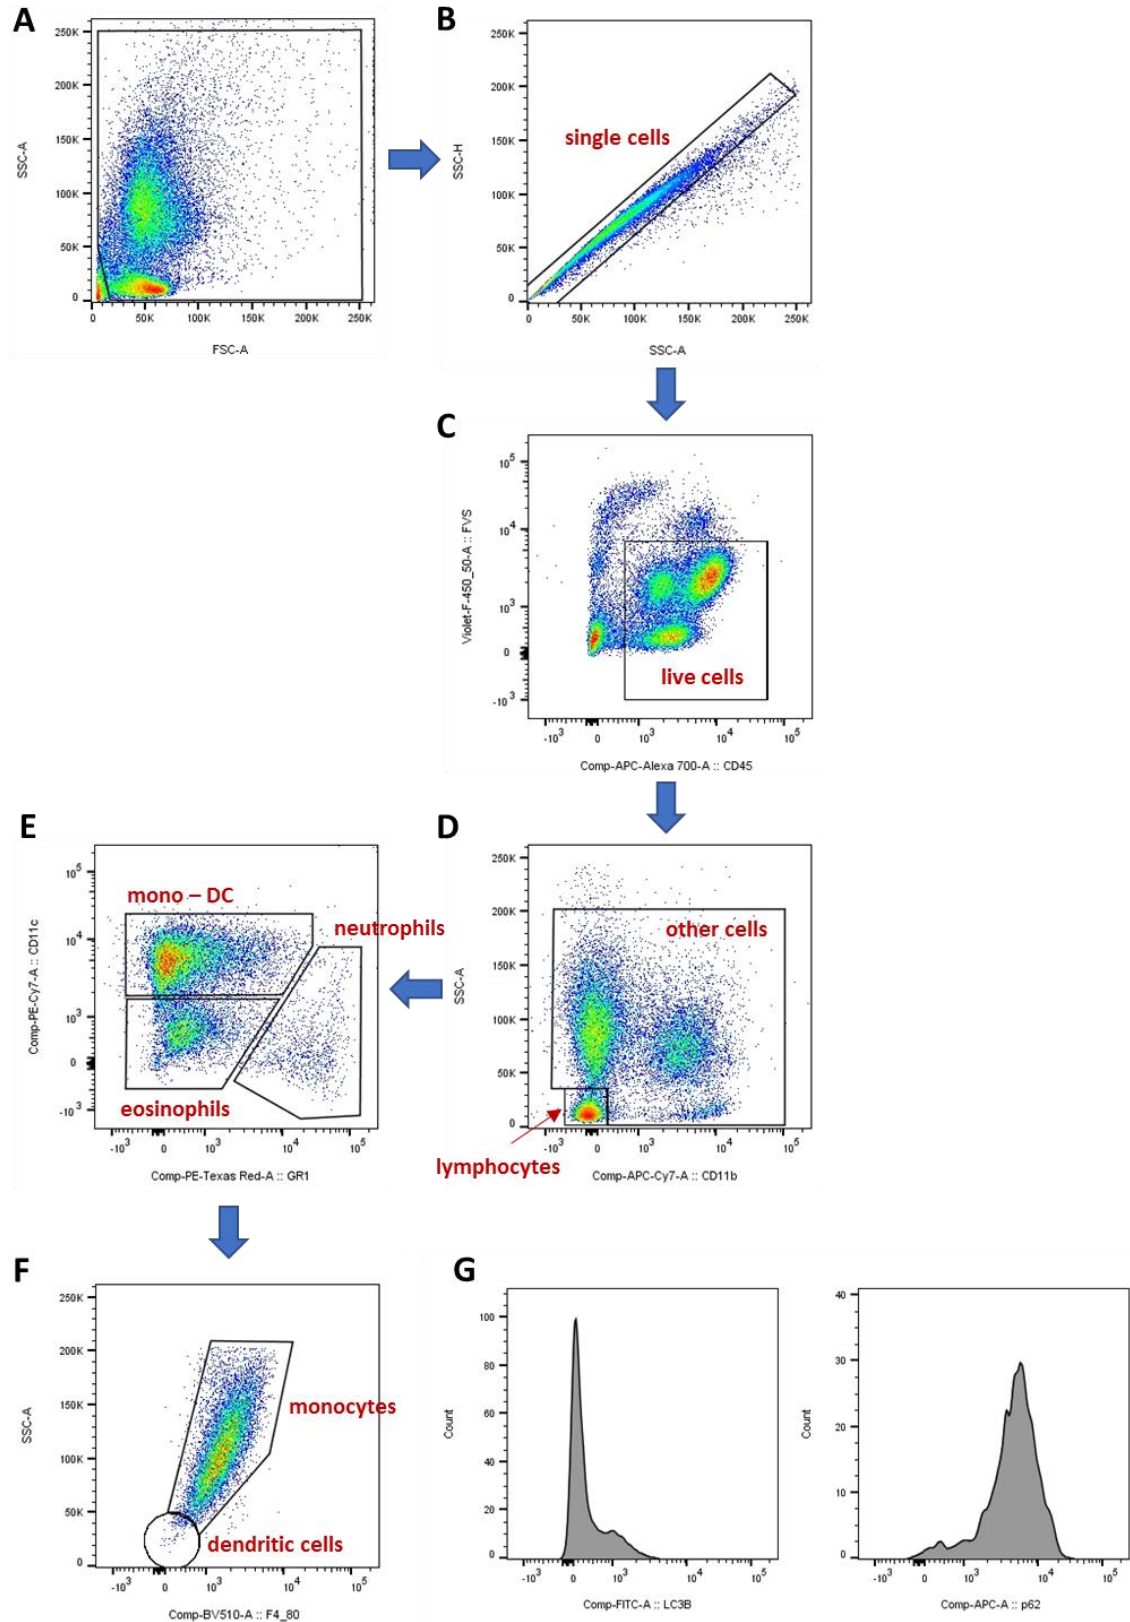

**Supplementary Figure S3.** Gating strategy for immune cell subsets in BALF and spleen. Cells were gated in SSC-A and FSC-A dot blot to eliminate debris (**A**). Then cells were gated in a SSC-H and SSC-A dot blot to eliminate doublets (**B**). CD45<sup>+</sup> cells were chosen to analyze live leucocytes (**C**). CD11b<sup>+</sup> cells were chosen to analyze mononuclear cells (**D**). Gr-1 and CD11c<sup>+</sup> cells were chosen to analyze monocytes and dendritic cells, eosinophils and neutrophils (**E**). F4/80 signal was used to distinguish dendritic cells from monocytes in BAL cell population (**F**). LC3B-II and SQSTM1/p62 expression was studied in these cell subsets (**G**). Abbreviations: FSC: Forward scatter; FSC-H: Forward scatter height; FSC-A: Forward scatter area; SSC: Side scatter.
